# Supplementary material
Source: publisher site journal article supplement (https://www.spandidos-publications.com/6769/downloadSupplementary)
Supplement: Supplementary file 1 [file downloadSupplementary]

## Sheet: Supplementary_Table_SV
Table SV. Differentially expressed genes between the Streptococcus-present and Streptococcus-absent groups.
Gene	Base mean	log2 fold change	lfcSE	Stat	P-value	padj
ABCA4	132.732	1.71094	0.390315	4.38349	1.17e-05	0.00224369
ABCC8	7.48004	-1.90462	0.529981	-3.59375	0.000325948	0.0239309
ACHE	238.46	-1.49006	0.356471	-4.18003	2.91e-05	0.0041369
ACSS3	120.679	1.82961	0.342604	5.34029	9.28e-08	4.9e-05
ADAMTS19	9.03046	2.13351	0.559266	3.81484	0.00013627	0.0127045
ADAMTS6	88.6599	-0.987299	0.266502	-3.70466	0.000211672	0.0174277
ADCY10	14.0007	1.39879	0.281484	4.96935	6.72e-07	0.000228156
ADCY5	290.241	-1.75969	0.37033	-4.75167	2.02e-06	0.000532915
ADCYAP1R1	48.0877	2.27402	0.405473	5.60831	2.04e-08	1.77e-05
ADGRD1	47.8011	1.71212	0.343632	4.98242	6.28e-07	0.00021925
ADGRG7	29.9171	-2.4604	0.644789	-3.81582	0.000135733	0.0127045
ADRA2A	413.972	1.27849	0.348282	3.67085	0.000241749	0.0191435
AGT	121.307	-1.3783	0.402008	-3.42854	0.000606835	0.0361799
AKR1B10	6365.02	2.02109	0.477571	4.23202	2.32e-05	0.00346836
AKR1C1	4726.05	1.95224	0.470339	4.1507	3.31e-05	0.00453535
AL121758.1	2.55425	1.1331	0.321052	3.52934	0.000416603	0.0279978
ALB	51.1754	-2.83438	0.545116	-5.19959	2e-07	8.83e-05
ALDH3A1	4752.99	1.52157	0.40942	3.71641	0.000202071	0.0170052
ALPI	12.1016	-4.40862	1.06868	-4.12527	3.7e-05	0.00503044
AMDHD1	101.519	1.44472	0.368092	3.92489	8.68e-05	0.00932353
ANGPTL1	42.631	-1.3627	0.384573	-3.54341	0.000394995	0.02683
ANKS4B	78.6755	-5.0755	0.752772	-6.74241	1.56e-11	6.05e-08
ANXA10	78.1055	2.0028	0.60117	3.33151	0.000863767	0.0483176
ANXA13	15.9385	-1.91329	0.50775	-3.76818	0.000164445	0.0146835
APOA1	19.4925	-1.47791	0.402686	-3.67014	0.000242415	0.0191435
APOH	6.26423	-4.13787	0.897871	-4.60853	4.06e-06	0.000964095
ARHGAP36	3.51177	-2.74097	0.798105	-3.43435	0.000593967	0.0360916
ARSH	35.5139	-1.26725	0.326124	-3.88578	0.000102002	0.0103191
ARSL	164.89	-2.44184	0.453842	-5.38037	7.43e-08	4.16e-05
ASCL5	15.7076	1.19113	0.342656	3.47616	0.000508654	0.0318226
ASTN1	20.0774	-1.66256	0.477266	-3.4835	0.000494898	0.031247
ATP2B3	8.73162	-2.14904	0.502228	-4.27902	1.88e-05	0.00300018
ATP4B	3.99259	-1.93329	0.489595	-3.94876	7.86e-05	0.00853144
B3GALT5	661.224	-1.82474	0.509908	-3.57856	0.000345489	0.0247957
BAMBI	928.269	1.08097	0.323952	3.33683	0.000847412	0.0476832
BTNL9	420.36	1.36636	0.343741	3.97498	7.04e-05	0.00787449
C11orf86	20.0458	-2.98538	0.748866	-3.98654	6.7e-05	0.00763549
C11orf91	5.9534	-1.18204	0.337199	-3.50548	0.000455782	0.0298914
C16orf54	202.561	1.0322	0.276243	3.73656	0.000186552	0.0161274
C17orf99	37.5981	1.24927	0.303486	4.11639	3.85e-05	0.0051704
C1GALT1C1L	27.1904	-1.4505	0.346806	-4.18246	2.88e-05	0.00412365
C4BPB	212.929	-2.85813	0.588671	-4.85523	1.2e-06	0.00035185
C7	80.1952	-1.80187	0.439973	-4.0954	4.21e-05	0.0054899
C8G	89.4757	1.16069	0.268103	4.32927	1.5e-05	0.0025634
CABYR	154.871	1.15386	0.268786	4.29286	1.76e-05	0.00286722
CACNA1E	25.5805	-1.37829	0.368412	-3.74117	0.000183167	0.0159071
CAGE1	18.0213	-1.02245	0.256133	-3.99186	6.56e-05	0.0075111
CALB1	672.847	-4.27812	0.592232	-7.22372	5.06e-13	5.14e-09
CAMK2B	195.116	-1.44556	0.397057	-3.64068	0.00027192	0.0210195
CAPN14	471.123	-1.58828	0.445228	-3.56735	0.000360608	0.0252133
CBR1	5146.61	0.82762	0.196338	4.21529	2.49e-05	0.0037066
CCDC190	214.862	-3.91181	0.615331	-6.35725	2.05e-10	4.88e-07
CCDC3	961.135	1.57148	0.264008	5.9524	2.64e-09	4.19e-06
CCL15	3.42713	-3.12225	0.837193	-3.72942	0.00019192	0.0165164
CCN6	86.3303	-1.8352	0.500202	-3.66891	0.000243584	0.0191435
CCND1	3775.53	0.990482	0.28882	3.42942	0.000604881	0.0361768
CD177	221.701	-2.2762	0.414461	-5.49195	3.98e-08	2.7e-05
CD300LG	7.21047	1.5463	0.410681	3.76522	0.000166403	0.0147889
CD8B2	190.836	2.61588	0.594383	4.40101	1.08e-05	0.00211269
CDH17	136.71	-1.84099	0.462895	-3.97713	6.98e-05	0.00784981
CDH4	77.8474	-1.88872	0.381627	-4.94912	7.45e-07	0.00024457
CDHR5	117.439	-2.89937	0.530959	-5.46062	4.74e-08	3.01e-05
CEACAM5	28400.4	-1.6982	0.47619	-3.56623	0.000362156	0.0252133
CEL	1400.77	-1.96811	0.401395	-4.90317	9.43e-07	0.000297654
CES1	3021.03	2.72761	0.590409	4.61987	3.84e-06	0.000924401
CGA	29.1694	-4.49087	0.807011	-5.56482	2.62e-08	2e-05
CGB8	5.64934	-1.92382	0.55287	-3.4797	0.00050197	0.0315081
CHGB	42.0393	-1.56334	0.42609	-3.66904	0.000243464	0.0191435
CHRM5	5.37602	1.09084	0.268047	4.06959	4.71e-05	0.00589281
CHRNA3	87.7715	-1.37266	0.377426	-3.6369	0.000275939	0.0211616
CLDN19	9.80523	-2.59171	0.574982	-4.50747	6.56e-06	0.00138637
CLDN2	55.9963	-2.10104	0.426706	-4.92387	8.49e-07	0.00027352
CLDN6	21.133	-1.93707	0.472588	-4.09886	4.15e-05	0.00548362
CLEC2A	69.6742	-2.7497	0.818944	-3.35762	0.000786172	0.0449015
CLRN3	51.2833	-5.28732	0.732857	-7.21467	5.41e-13	5.14e-09
COL16A1	5792.01	0.87178	0.23654	3.68556	0.000228202	0.0184887
COL2A1	85.9419	-2.04989	0.418553	-4.89756	9.7e-07	0.000297654
COX7A1	181.052	1.13469	0.251732	4.50755	6.56e-06	0.00138637
CPLX2	25.3189	3.56591	0.670388	5.31917	1.04e-07	5.22e-05
CPS1	199.01	-2.2352	0.460946	-4.84915	1.24e-06	0.000357306
CPT1A	3576.13	0.525996	0.158442	3.31979	0.000900851	0.0496617
CRABP1	34.5326	-2.11175	0.635833	-3.32124	0.000896199	0.0495489
CRLF1	384.013	-1.48278	0.421838	-3.51504	0.00043968	0.0291368
CRTAC1	86.2902	1.86327	0.461927	4.03368	5.49e-05	0.00660975
CT83	135.616	-5.61742	1.04067	-5.39792	6.74e-08	4.14e-05
CYP1A1	5.54646	2.06942	0.522011	3.96433	7.36e-05	0.00818628
CYP2A13	11.7176	-2.86581	0.797653	-3.5928	0.000327148	0.0239309
CYP2B6	16.7953	-3.15406	0.657183	-4.79936	1.59e-06	0.000438654
CYP2C9	65.8053	-1.875	0.504958	-3.71317	0.000204679	0.0170482
CYP2F1	13.7667	-2.23573	0.581195	-3.84678	0.000119679	0.0116727
CYP4F11	986.205	1.51136	0.348461	4.33723	1.44e-05	0.00252834
CYP4F3	1596.15	1.51993	0.372931	4.07564	4.59e-05	0.00581835
DCDC2	228.99	-2.11677	0.52915	-4.00033	6.33e-05	0.00729109
DDC	30.4335	-2.84458	0.528169	-5.38573	7.22e-08	4.16e-05
DGKG	109.702	1.32122	0.32873	4.01915	5.84e-05	0.00689981
DHRS2	405.207	2.1947	0.377261	5.81747	5.97e-09	6.78e-06
DIRAS2	50.2436	2.07487	0.582136	3.56424	0.000364911	0.0252372
DLK1	8.27563	-3.78574	0.894444	-4.23251	2.31e-05	0.00346836
DLX1	39.8105	-1.69487	0.489911	-3.45956	0.000541066	0.0336292
DNAJB4	1164.31	0.660095	0.173428	3.80616	0.000141143	0.0130381
DSCAM	8.99355	-2.22583	0.627681	-3.54611	0.000390963	0.0266921
DYNAP	26.4812	-2.72888	0.739477	-3.69028	0.000224005	0.0182848
ELOVL2	92.3218	-1.9014	0.418369	-4.54479	5.5e-06	0.00126005
ENDOU	94.9523	-2.01329	0.447068	-4.50332	6.69e-06	0.00139824
ENPP6	49.8588	1.86366	0.400256	4.65617	3.22e-06	0.000816935
EPHB6	1551.81	0.923944	0.257864	3.58306	0.000339589	0.024709
EREG	351.724	-1.6469	0.480046	-3.43072	0.000601974	0.0361768
ERVV-1	7.45506	-2.60663	0.745762	-3.49525	0.00047361	0.0306684
F13B	1.21462	-1.95607	0.561634	-3.48282	0.000496167	0.031247
F2RL2	138.803	1.24583	0.281943	4.41875	9.93e-06	0.00198746
F3	10380.7	-1.20342	0.333811	-3.60508	0.000312058	0.0231837
FABP1	6.88528	-4.66653	1.22074	-3.82269	0.000132002	0.0125418
FAM71F1	4.3475	-1.67957	0.497614	-3.37525	0.00073749	0.0423756
FBXW10	8.96449	1.52932	0.351983	4.34486	1.39e-05	0.00247719
FDCSP	486.33	-3.65815	0.688901	-5.31013	1.1e-07	5.34e-05
FGF4	6.91769	5.64422	1.49162	3.78394	0.000154363	0.0138482
FGG	35.1151	-4.40754	0.859961	-5.12528	2.97e-07	0.000121208
FLG	146.143	-1.75658	0.509072	-3.45056	0.000559431	0.0346574
FOXC1	1229.43	-0.865038	0.237299	-3.64534	0.000267034	0.0208103
FSD1	70.988	1.14564	0.287946	3.97866	6.93e-05	0.00784577
G6PD	5958.16	1.33377	0.200534	6.65108	2.91e-11	9.22e-08
GAB4	4.55611	-4.44489	1.3133	-3.38452	0.00071303	0.0412192
GABRR1	29.8739	-2.47467	0.614132	-4.02955	5.59e-05	0.00664289
GAD1	429.856	1.09522	0.304604	3.59556	0.000323696	0.0238619
GALT	688.026	0.52544	0.130954	4.01239	6.01e-05	0.00701336
GBX2	41.1763	-1.76618	0.433582	-4.07347	4.63e-05	0.00583381
GCKR	12.9697	-1.22	0.349804	-3.48768	0.000487236	0.0308915
GCLC	3554.28	1.02382	0.262788	3.89598	9.78e-05	0.0101644
GCLM	2271.86	0.884904	0.210083	4.21217	2.53e-05	0.0037291
GFRA1	62.1965	-1.17416	0.345851	-3.39497	0.000686354	0.0401654
GFRA2	38.537	1.14957	0.342669	3.35475	0.000794367	0.0452337
GP2	8.74478	-4.35327	1.01704	-4.28034	1.87e-05	0.00300018
GPR15	78.9796	1.77872	0.438754	4.05403	5.03e-05	0.00613766
GRIN2A	112.607	1.80923	0.535106	3.38107	0.000722048	0.041614
GSC2	8.45068	-2.17369	0.522559	-4.1597	3.19e-05	0.0044238
GSTA1	173.689	-3.29889	0.687768	-4.79652	1.61e-06	0.000438654
GSTM3	2383.55	1.41977	0.339352	4.18378	2.87e-05	0.00412365
HAL	75.755	-1.1002	0.321166	-3.42565	0.000613332	0.0363395
HAO2	2.28406	1.62064	0.454948	3.56225	0.000367691	0.0253374
HIF3A	134.806	-1.3192	0.38872	-3.39371	0.000689528	0.0402274
HMGCS2	70.0852	-2.8011	0.656504	-4.2667	1.98e-05	0.00309277
HNF4A	178.818	-3.91166	0.580414	-6.73944	1.59e-11	6.05e-08
HSPA1A	9819.47	0.728463	0.204238	3.56674	0.000361456	0.0252133
HSPA1B	8566.98	0.609658	0.180073	3.38561	0.000710196	0.0411805
IDH1	5853.72	0.716393	0.162715	4.40275	1.07e-05	0.00211269
IGFBP1	11.1234	-2.24556	0.603708	-3.71961	0.000199531	0.0169414
IGFL2	127.365	-1.53856	0.43152	-3.56545	0.000363239	0.0252133
IGSF11	36.3454	-1.47794	0.430587	-3.43239	0.000598281	0.0361229
IHH	49.3518	-2.07595	0.579625	-3.58154	0.000341578	0.024709
INHBB	605.594	1.3847	0.360083	3.84549	0.00012031	0.0116743
JAKMIP2	34.2502	1.08879	0.251203	4.33429	1.46e-05	0.00252834
JAKMIP3	38.9469	1.27148	0.351742	3.61481	0.000300571	0.0224178
KCNIP2	72.9434	0.764828	0.175857	4.34916	1.37e-05	0.00245205
KCNJ16	47.8598	-2.92995	0.583242	-5.02355	5.07e-07	0.000182023
KCNJ3	7.1314	-1.87875	0.545268	-3.44554	0.000569914	0.0351922
KCNJ6	8.65262	-1.37766	0.385977	-3.56927	0.00035798	0.0252133
KCNK15	141.71	-1.22925	0.343225	-3.58146	0.000341683	0.024709
KCNQ4	105.836	-0.977245	0.26102	-3.74395	0.000181146	0.0158038
KDM4E	2.53977	2.46963	0.672643	3.67153	0.0002411	0.0191435
KEL	105.507	1.28245	0.345389	3.71305	0.00020478	0.0170482
KLK12	344.48	-2.53908	0.603972	-4.20396	2.62e-05	0.00383717
KLK13	1925.96	-1.96878	0.528534	-3.72499	0.000195325	0.0166587
KLK14	135.805	-1.84564	0.428239	-4.30984	1.63e-05	0.00277422
KLK6	595.146	-1.79792	0.484297	-3.71244	0.00020527	0.0170482
KREMEN2	565.292	1.65427	0.326128	5.07245	3.93e-07	0.000146453
KRT2	57.1005	2.48354	0.515526	4.8175	1.45e-06	0.000406583
KRT20	26.4242	-2.82855	0.609853	-4.63809	3.52e-06	0.000868578
KRT24	761.919	-3.50558	0.715557	-4.8991	9.63e-07	0.000297654
KRT27	8.30316	-2.24942	0.64378	-3.49408	0.000475691	0.0306684
KRT72	6.39516	1.54061	0.435956	3.53388	0.000409515	0.0277173
KRT73	3.5488	2.18188	0.557245	3.91547	9.02e-05	0.00953381
KRT76	8.16426	-1.92335	0.542445	-3.54571	0.00039156	0.0266921
KRT79	82.156	-1.78298	0.479656	-3.7172	0.000201441	0.0170052
KRT81	668.911	-2.02067	0.425162	-4.75271	2.01e-06	0.000532915
LAMA1	371.099	-1.63036	0.440611	-3.70021	0.000215418	0.0176596
LBP	38.5797	-2.55249	0.582974	-4.3784	1.2e-05	0.00225133
LCN15	7.2477	-3.27068	0.837972	-3.90309	9.5e-05	0.00997956
LEF1	590.178	0.878071	0.255183	3.44095	0.000579673	0.0355774
LEFTY1	36.3534	-3.23547	0.550924	-5.87282	4.28e-09	5.43e-06
LGALS4	378.128	-2.93337	0.490185	-5.98421	2.17e-09	3.76e-06
LIFR	867.772	1.14832	0.284853	4.03127	5.55e-05	0.0066358
LIN7A	74.1851	1.416	0.301461	4.69712	2.64e-06	0.000687431
LMO3	204.262	-1.78443	0.399934	-4.4618	8.13e-06	0.00166212
LRRC19	15.25	-1.67001	0.408781	-4.08535	4.4e-05	0.00563115
LRRC4C	37.4353	1.51386	0.433953	3.48854	0.000485672	0.0308915
LRRTM2	8.00115	0.988044	0.271465	3.63968	0.000272981	0.0210195
LTF	6785.76	2.98098	0.581797	5.12374	3e-07	0.000121208
MAP2	736.073	1.41079	0.343608	4.1058	4.03e-05	0.00535874
MAP3K14	1130.59	0.598609	0.15438	3.8775	0.000105535	0.010564
MAPK4	150.156	-3.2926	0.585887	-5.61985	1.91e-08	1.73e-05
MARCOL	10.0549	-4.19955	0.988311	-4.24922	2.15e-05	0.00329027
MDGA1	938.112	1.29801	0.30213	4.2962	1.74e-05	0.00286722
MEGF11	28.7723	-1.08143	0.296741	-3.64434	0.000268075	0.0208103
METTL24	15.3342	2.16555	0.437571	4.94903	7.46e-07	0.00024457
MGAT4C	9.84015	2.74082	0.49003	5.59316	2.23e-08	1.84e-05
MMP13	1387.2	-2.53919	0.500029	-5.07809	3.81e-07	0.000145016
MORN3	222.666	-1.14201	0.298824	-3.82168	0.000132546	0.0125418
MUC2	417.135	-2.02527	0.486469	-4.16321	3.14e-05	0.00438846
MUC3A	192.517	-2.33435	0.452764	-5.15577	2.53e-07	0.000109182
MUCL3	133.886	-2.36189	0.609747	-3.87356	0.000107256	0.0106245
MYO1A	41.9312	-2.03775	0.39914	-5.10535	3.3e-07	0.000128157
MYO7B	244.72	-2.87374	0.471045	-6.10078	1.06e-09	2.01e-06
NEU4	57.8792	-1.62383	0.400526	-4.05424	5.03e-05	0.00613766
NEUROD2	9.54598	-1.7649	0.44537	-3.96278	7.41e-05	0.00819155
NINJ1	3277.57	0.704686	0.166404	4.23478	2.29e-05	0.00346836
NKX2-2	10.4093	-4.78283	1.09183	-4.38058	1.18e-05	0.00225117
NOTUM	178.703	2.26867	0.401767	5.64674	1.64e-08	1.55e-05
NRCAM	527.926	-1.71663	0.403477	-4.25459	2.09e-05	0.00323837
NTRK2	3677.15	1.84517	0.484803	3.80602	0.000141219	0.0130381
NTS	2915.38	-2.6824	0.6895	-3.89036	0.000100094	0.0103048
NXF3	40.8695	-2.03253	0.437278	-4.64814	3.35e-06	0.000838197
ODAPH	16.968	-1.35887	0.408371	-3.32755	0.000876145	0.0488663
OR2B6	58.7584	1.04339	0.291972	3.57359	0.000352118	0.0251764
OR7D2	11.1009	-2.58229	0.488641	-5.28464	1.26e-07	5.99e-05
ORM2	13.8025	-1.70014	0.470322	-3.61484	0.000300537	0.0224178
OSBP2	1700.12	-1.24361	0.303912	-4.092	4.28e-05	0.00553328
OTOA	11.7498	0.861376	0.258083	3.3376	0.000845063	0.0476832
OVCH2	19.48	-2.30948	0.525498	-4.39485	1.11e-05	0.00215126
PAEP	46.0131	-2.27978	0.585123	-3.89624	9.77e-05	0.0101644
PATL2	103.08	0.765873	0.214748	3.56639	0.000361933	0.0252133
PBLD	374.632	-0.869316	0.223631	-3.88728	0.000101376	0.0103105
PCK1	65.5746	-3.27783	0.677357	-4.83915	1.3e-06	0.000370141
PCP4L1	899.634	-1.57454	0.473331	-3.32652	0.00087939	0.0489039
PCSK2	11.3656	-2.73359	0.703024	-3.88833	0.000100936	0.0103105
PDE10A	529.386	-2.06985	0.409609	-5.05325	4.34e-07	0.000158866
PDE6A	25.4884	-1.30454	0.371006	-3.51623	0.000437729	0.0291368
PGC	10.9122	-2.66135	0.654733	-4.06478	4.81e-05	0.00593752
PIWIL2	80.6918	-1.68522	0.438742	-3.84104	0.000122516	0.011828
PKHD1	45.0486	-2.40697	0.573152	-4.19953	2.67e-05	0.00388321
PLA2G2A	132.872	-2.08242	0.537539	-3.87399	0.000107067	0.0106245
PLA2G4C	291.644	0.909869	0.239362	3.80123	0.000143979	0.0132286
PLA2G6	871.029	0.751092	0.174745	4.29822	1.72e-05	0.00286722
PLEKHD1	83.958	1.55196	0.401698	3.86349	0.000111777	0.011015
PLGRKT	1440.29	0.617567	0.166521	3.70864	0.000208373	0.0172306
PLSCR2	15.0305	-0.970883	0.264497	-3.67067	0.000241914	0.0191435
PLXNA4	96.2454	1.52818	0.366513	4.16951	3.05e-05	0.00430052
PNMA2	139.358	-1.90394	0.464702	-4.09712	4.18e-05	0.00548705
PRKY	3.34778	-1.61021	0.482133	-3.33977	0.00083847	0.0474609
PRSS2	33.3778	-2.47572	0.707036	-3.50155	0.000462566	0.0301631
PRSS51	13.7246	-1.51289	0.367591	-4.11568	3.86e-05	0.0051704
PTGR1	2931.27	0.855313	0.197318	4.3347	1.46e-05	0.00252834
PTP4A1	15.898	-1.59769	0.392834	-4.0671	4.76e-05	0.0059172
RAB3B	242.417	2.0621	0.402841	5.1189	3.07e-07	0.000121767
RANBP3L	15.3797	-1.24028	0.354239	-3.50124	0.000463097	0.0301631
RASGEF1C	23.464	-1.40625	0.400541	-3.51086	0.000446653	0.0294961
REG1A	59.0534	-3.48566	0.999427	-3.48766	0.000487273	0.0308915
REG4	44.1694	-3.20092	0.656429	-4.87626	1.08e-06	0.000326396
RERGL	26.2779	2.27978	0.468211	4.86913	1.12e-06	0.000333106
RGPD1	5.22865	1.54633	0.426237	3.62786	0.000285776	0.0217407
RGPD3	18.1889	1.30012	0.282317	4.60516	4.12e-06	0.000967743
RNASE10	16.1578	1.55263	0.465688	3.33406	0.000855868	0.048017
RNF182	205.632	-1.76055	0.504753	-3.48794	0.000486758	0.0308915
ROPN1	2.07407	-2.71965	0.688914	-3.94774	7.89e-05	0.00853144
RP1L1	70.6265	-1.37459	0.321636	-4.27374	1.92e-05	0.00304652
RPE65	7.26394	-3.59261	0.721327	-4.98055	6.34e-07	0.00021925
RSPO4	32.1077	-2.1732	0.496924	-4.37331	1.22e-05	0.00227941
RYR3	230.056	1.05338	0.312419	3.37169	0.000747086	0.0427977
SCN4A	6.74976	2.55059	0.406332	6.2771	3.45e-10	7.29e-07
SCN9A	165.088	1.72544	0.436817	3.95004	7.81e-05	0.00853144
SEC14L6	57.0273	1.78883	0.386914	4.62332	3.78e-06	0.000920838
SERPINA4	56.3812	-3.19523	0.928617	-3.44085	0.000579893	0.0355774
SFTA2	302.351	-2.4938	0.561951	-4.43775	9.09e-06	0.00183927
SHISA7	8.61211	-1.39748	0.386178	-3.61874	0.000296044	0.0223431
SHISAL1	235.514	-1.17681	0.33002	-3.56587	0.000362645	0.0252133
SI	7.34779	-4.35903	1.13203	-3.85065	0.000117806	0.0115492
SLAMF9	57.3446	-1.46729	0.410824	-3.57158	0.000354828	0.0252133
SLC26A3	10.4486	-2.55137	0.586262	-4.35193	1.35e-05	0.00245205
SLC26A4	107.184	2.09929	0.383093	5.47985	4.26e-08	2.79e-05
SLC2A14	27.3243	-2.39688	0.467741	-5.12438	2.99e-07	0.000121208
SLC38A4	85.9421	-1.3827	0.402242	-3.43749	0.000587136	0.0359059
SLC38A8	6.75298	-2.47143	0.701111	-3.52502	0.000423456	0.0283582
SLC39A5	41.0916	-1.63896	0.415182	-3.94757	7.89e-05	0.00853144
SLC46A2	12.3909	2.19906	0.387141	5.68024	1.35e-08	1.35e-05
SLC47A2	260.8	2.53373	0.372711	6.79811	1.06e-11	6.05e-08
SLC6A14	3988.04	-1.85096	0.433306	-4.27171	1.94e-05	0.00304899
SLC7A11	1175.63	1.99295	0.357531	5.57419	2.49e-08	1.97e-05
SLC9A9	484.865	1.00381	0.292916	3.42697	0.000610353	0.036276
SLCO4C1	86.9395	-1.78435	0.491725	-3.62875	0.000284793	0.0217407
SLITRK2	17.3655	1.97194	0.507764	3.88358	0.000102929	0.0103577
SMIM2	1.11796	1.67293	0.499558	3.34882	0.000811571	0.0460754
SMIM24	118.371	-2.413	0.44759	-5.3911	7e-08	4.16e-05
SMOC1	2059.46	-2.32931	0.514153	-4.53039	5.89e-06	0.00131735
SMTNL2	38.7903	-1.64358	0.436709	-3.76355	0.000167518	0.0148187
SNX31	123.669	-2.65848	0.499589	-5.32133	1.03e-07	5.22e-05
SOCS1	602.376	0.762743	0.210679	3.6204	0.000294147	0.0222884
SOST	26.8387	2.87196	0.44507	6.45283	1.1e-10	2.98e-07
SP5	188.991	1.5499	0.451104	3.43579	0.000590825	0.0360157
SP7	1.45778	1.9476	0.432883	4.49913	6.82e-06	0.00141055
SPINK1	350.651	-3.79504	0.642849	-5.90347	3.56e-09	4.84e-06
SPINK13	20.0446	-3.66466	0.699691	-5.23755	1.63e-07	7.55e-05
SPINK6	302.023	-4.12339	0.711752	-5.79329	6.9e-09	7.29e-06
SPOCK2	2260.27	0.992897	0.283146	3.50667	0.000453755	0.0298615
SPTA1	2.78298	1.39386	0.345482	4.03454	5.47e-05	0.00660975
SPX	12.9084	-2.15857	0.493792	-4.37141	1.23e-05	0.00227941
SSC4D	332.362	-1.21549	0.336112	-3.61633	0.000298815	0.0224178
STAR	65.6448	1.85813	0.337388	5.5074	3.64e-08	2.57e-05
STXBP5L	42.1926	2.60307	0.447636	5.81515	6.06e-09	6.78e-06
SULT1B1	63.672	-1.50905	0.397486	-3.79649	0.000146758	0.013355
SULT1C2	93.025	-1.62897	0.426724	-3.81739	0.000134872	0.0126987
SYN3	31.3673	-1.14552	0.334827	-3.42122	0.000623414	0.0367081
SYT14	27.2353	-2.85301	0.533853	-5.34419	9.08e-08	4.9e-05
SYT2	58.7161	-1.03824	0.312437	-3.32303	0.000890459	0.049375
TAAR1	7.8964	-3.73145	0.996646	-3.74401	0.000181108	0.0158038
TAGLN3	12.3505	-1.76277	0.461037	-3.82349	0.000131577	0.0125418
TESC	324.846	-1.80913	0.397309	-4.55345	5.28e-06	0.00122402
TF	279.549	-1.37441	0.405671	-3.38798	0.000704099	0.0409519
TFF3	2927.34	-2.37098	0.591165	-4.01069	6.05e-05	0.00702108
TIMP4	20.9459	1.69628	0.40829	4.1546	3.26e-05	0.00449093
TLX1	36.8883	-3.02172	0.647981	-4.66328	3.11e-06	0.000799847
TMEM116	636.884	1.00264	0.169459	5.91673	3.28e-09	4.8e-06
TMEM178A	96.1678	-2.05299	0.371449	-5.52697	3.26e-08	2.38e-05
TMEM35A	72.2725	-2.19269	0.503987	-4.35069	1.36e-05	0.00245205
TMEM72	5.52967	-2.49718	0.729454	-3.42336	0.000618516	0.0365328
TMOD1	269.771	1.41729	0.329612	4.29986	1.71e-05	0.00286722
TRAF1	861.008	0.868035	0.19231	4.51373	6.37e-06	0.00137663
TRIM16L	780.946	1.24892	0.239649	5.21145	1.87e-07	8.48e-05
TRIM31	1003.28	-1.72311	0.454225	-3.79351	0.000148534	0.0134522
TRIM71	8.94124	-2.05671	0.503503	-4.08479	4.41e-05	0.00563115
TSPAN11	240.992	1.03036	0.286324	3.59857	0.000319975	0.0236794
TSPAN7	640.812	1.34209	0.374933	3.57955	0.000344192	0.0247957
TSPAN8	1258.93	-2.25574	0.60514	-3.72763	0.000193286	0.016559
TTR	7.73433	-2.91349	0.848655	-3.43306	0.000596801	0.0361229
TTYH1	69.0154	-0.990742	0.29149	-3.39888	0.00067662	0.039718
TXNRD1	5360.05	0.817819	0.203567	4.01744	5.88e-05	0.00690722
UBE2QL1	114.878	1.11	0.317637	3.49457	0.000474826	0.0306684
UCHL1	2324.34	1.63134	0.415986	3.92162	8.8e-05	0.009398
UPK1B	204.592	-2.27875	0.581976	-3.91553	9.02e-05	0.00953381
UPK2	165.729	-1.46445	0.414719	-3.53119	0.000413687	0.0279004
USH1C	262.074	-2.39532	0.652109	-3.67318	0.000239547	0.0191435
VCAM1	1273.86	1.27761	0.328433	3.89002	0.000100236	0.0103048
VCX	3.16551	-2.32116	0.676719	-3.43002	0.000603545	0.0361768
VSIG8	7.69013	-1.69017	0.461553	-3.66193	0.000250322	0.019592
VSTM2L	300.142	-1.61579	0.43105	-3.7485	0.000177894	0.0156638
VSTM4	329.209	1.20897	0.281623	4.29288	1.76e-05	0.00286722
VTN	40.439	-1.58111	0.449727	-3.51571	0.00043858	0.0291368
WNK4	252.204	-1.71488	0.379359	-4.52047	6.17e-06	0.00136455
XKR4	15.19	1.95002	0.513235	3.79946	0.00014501	0.0132594
lfcSE, standard error of the log fold change; padj, adjusted P-value.
